# Supplementary material for: Risks of Bleeding and Stroke Based on CHA2DS2‐VASc Scores in Japanese Patients With Atrial Fibrillation: A Large‐Scale Observational Study Using Real‐World Data
Source: PubMed Central journal article supplement — J Am Heart Assoc. 2020 Feb 28;9(5):e014574. doi: 10.1161/JAHA.119.014574 (PMC7335551; doi:10.1161/jaha.119.014574), 2020-02-28
Supplement: JAH3-9-e014574-s001.pdf [file JAH3-9-e014574-s001.pdf]

# **SUPPLEMENTAL MATERIAL**

**Table S1. Definition of GI bleeding.**

| <b>Japanese disease code</b> | <b>Disease</b>                               |
|------------------------------|----------------------------------------------|
| 5789001                      | Gastric bleeding                             |
| 5781002                      | Lower gastrointestinal bleeding              |
| 8832368                      | Acute hemorrhagic necrotizing pancreatitis   |
| 5319011                      | Acute hemorrhagic gastric ulcer              |
| 8831551                      | Hepatic bleeding                             |
| 5289010                      | Oral bleeding                                |
| 5308005                      | Esophageal bleeding                          |
| 8834466                      | Gingival bleeding                            |
| 5220084                      | Pulp bleeding                                |
| 8834631                      | Hemorrhagic gastritis                        |
| 8834632                      | Hemorrhagic gastric ulcer                    |
| 8834637                      | Hemorrhagic jawbone cyst                     |
| 5280051                      | Hemorrhagic stomatitis                       |
| 8834641                      | Hemorrhagic duodenal ulcer                   |
| 5789007                      | Digestive tract bleeding                     |
| 8833703                      | Anal bleeding                                |
| 5789008                      | Upper gastrointestinal bleeding              |
| 8836434                      | Tongue base submucosal hemorrhage            |
| 8837732                      | Intestinal bleeding                          |
| 5693001                      | Rectal bleeding                              |
| 8839763                      | Peritoneal bleeding                          |
| 8837584                      | Central hemorrhagic liver necrosis           |
| 8839651                      | Intra-abdominal hemorrhage                   |
| 5789011                      | Bleeding after defecation                    |
| 8845131                      | Hemorrhagic duodenal ulcer perforation       |
| 8845130                      | Hemorrhagic gastric ulcer perforation        |
| 8845122                      | Acute hemorrhagic gastric ulcer perforation  |
| 8845123                      | Acute hemorrhagic duodenal ulcer             |
| 8845814                      | Diverticulum hemorrhage                      |
| 8845742                      | Sigmoid diverticulum hemorrhage              |
| 8845806                      | Ascending colon diverticulum hemorrhage      |
| 8845749                      | Transverse colon diverticulum hemorrhage     |
| 8845124                      | Acute hemorrhagic duodenal ulcer perforation |
| 8845800                      | Duodenal diverticulum hemorrhage             |
| 8845763                      | Descending colonic diverticulum hemorrhage   |
| 8847762                      | Hemorrhagic anastomotic ulcer                |

|                |                                    |
|----------------|------------------------------------|
| <b>8847788</b> | Multiple hemorrhagic gastric ulcer |
| <b>8848141</b> | Small intestine bleeding           |

**Table S2. Definition of other bleeding.**

| <b>Japanese disease code</b> | <b>Disease</b>                        |
|------------------------------|---------------------------------------|
| 7827001                      | Petechia in lower extremity           |
| 8830641                      | Throat bleeding                       |
| 8830697                      | Intravaginal hemorrhage               |
| 7848002                      | Pharyngeal bleeding                   |
| 6078036                      | Penile bleeding                       |
| 3628002                      | Macular bleeding                      |
| 8830975                      | Submacular hemorrhage                 |
| 6245002                      | Vulvar bleeding                       |
| 7863001                      | Bronchial bleeding                    |
| 8832116                      | Multiple facial subcutaneous bleeding |
| 6266004                      | Organic genital bleeding              |
| 3628025                      | Fundus hemorrhage                     |
| 8832068                      | Subcutaneous bleeding in eye          |
| 8832181                      | Bleeding in tracheostomy site         |
| 5191010                      | Endotracheal bleeding                 |
| 5950002                      | Acute hemorrhagic cystitis            |
| 8831810                      | Outer ear subcutaneous bleeding       |
| 8832240                      | Airway bleeding                       |
| 6268001                      | Functional uterine bleeding           |
| 6260001                      | Functional genital hemorrhage         |
| 8832247                      | Hypofunction uterine bleeding         |
| 8831990                      | Eyelids bleeding                      |
| 8833488                      | Lip labial bleeding                   |
| 8832022                      | Subcutaneous bleeding around the eye  |
| 3727006                      | Subconjunctival hemorrhage            |
| 3604008                      | Intraocular bleeding                  |
| 9211007                      | Glasses-like subcutaneous bleeding    |
| 8831968                      | Conjunctival hemorrhage               |
| 3644003                      | Iris bleeding                         |
| 7848003                      | Laryngeal bleeding                    |
| 8833510                      | Thyroid bleeding                      |
| 8832405                      | Acute massive bleeding                |
| 8832664                      | Local bleeding                        |
| 2879002                      | Petechia on the extremities           |
| 6268005                      | Uterine bleeding                      |
| 3848003                      | Tympanic bleeding                     |

|         |                                                |
|---------|------------------------------------------------|
| 4560002 | Esophageal varices hemorrhage                  |
| 7827013 | Diffuse subcutaneous hemorrhage                |
| 8833946 | Umbilical cord subcutaneous bleeding           |
| 8834774 | Small artery hemorrhage                        |
| 8834262 | Uterine irregular bleeding                     |
| 8834344 | Optic nerve pericapsular bleeding              |
| 4590002 | bleeding                                       |
| 2869010 | Bleeding tendency                              |
| 8834634 | Hemorrhagic keratitis                          |
| 8834635 | Hemorrhagic otitis externa                     |
| 8834636 | Hemorrhagic external hemorrhoid                |
| 8834638 | Hemorrhagic tracheitis                         |
| 8834639 | Hemorrhagic iritis                             |
| 9584004 | Hemorrhagic shock                              |
| 8834640 | Hemorrhagic hemorrhoid                         |
| 7573086 | Hemorrhagic urticarial                         |
| 5789018 | Hemorrhagic colitis                            |
| 8834642 | Hemorrhagic otitis media                       |
| 7847002 | Habitual nasal bleeding                        |
| 8833916 | Post bleeding                                  |
| 8834333 | Optic nerve sheath hemorrhage                  |
| 5789014 | Hemorrhagic enteritis                          |
| 8834643 | Hemorrhagic internal hemorrhoid                |
| 4709003 | Bleeding nasal polyp                           |
| 2809005 | Hemorrhagic anemia                             |
| 8842024 | Hemorrhagic cystitis                           |
| 8834644 | Hemorrhagic retinitis                          |
| 8834645 | Hemorrhagic follicle follicles                 |
| 3659001 | Hemorrhagic glaucoma                           |
| 8835174 | Pinnacle subcutaneous bleeding                 |
| 3809001 | Ear bleeding                                   |
| 6269004 | Genital bleeding                               |
| 4590003 | Venous bleeding                                |
| 6263005 | Juvenile uterine bleeding                      |
| 7848005 | Vocal cord hemorrhage                          |
| 8834734 | Subvitreous hemorrhage                         |
| 3792006 | Vitreous hemorrhage                            |
| 3361019 | Intrathecal hemorrhage                         |
| 3621012 | Juvenile recurrent retinal vitreous hemorrhage |
| 8835604 | Perirenal hemorrhage                           |
| 5938028 | Renal hemorrhage                               |

|         |                                                 |
|---------|-------------------------------------------------|
| 4789006 | Upper airway bleeding                           |
| 3361005 | Spinal cord hemorrhage                          |
| 3361013 | Spinal subdural hemorrhage                      |
| 4320004 | Spinal epidural hemorrhage                      |
| 8835227 | Parenchymatous organ bleeding                   |
| 8837065 | Multiple subcutaneous bleeding                  |
| 7827005 | Subcutaneous thigh bleeding                     |
| 8837085 | Massive bleeding                                |
| 8844477 | Postoperative hemorrhagic shock                 |
| 9980002 | Postoperative digestive tract hemorrhagic shock |
| 8836485 | Forehead subcutaneous bleeding                  |
| 8842779 | Bleeding after biopsy                           |
| 6117032 | Papillary bleeding                              |
| 4590006 | Internal bleeding                               |
| 9209062 | Subcutaneous head bleeding                      |
| 8837515 | Vaginal stump bleeding                          |
| 8837244 | Third stage bleeding                            |
| 8836580 | Anterior chamber bleeding                       |
| 6117024 | Breast bleeding                                 |
| 6021002 | Prostate bleeding                               |
| 7847006 | Septal hemorrhage                               |
| 8839531 | Nasal subcutaneous bleeding                     |
| 3888004 | Middle ear bleeding                             |
| 7827007 | Patchy hemorrhage                               |
| 5938021 | Idiopathic renal hemorrhage                     |
| 5997011 | Urethral bleeding                               |
| 8838196 | Idiopathic plaque hemorrhage                    |
| 7847003 | Idiopathic nasal bleeding                       |
| 6269007 | Illegal genital bleeding                        |
| 7848006 | Sudden onset pharyngeal bleeding                |
| 8839467 | Nasal bleeding                                  |
| 7827006 | Petechiae bleeding                              |
| 5258013 | Bleeding after tooth extraction                 |
| 4590005 | Arterial bleeding                               |
| 8839683 | Adrenal hemorrhage                              |
| 3628019 | Superficial retinal hemorrhage                  |
| 9983022 | Bleeding due to suture failure                  |
| 4462004 | Alveolar hemorrhage                             |
| 8840624 | Subretinal pigmentary subcutaneous hemorrhage   |
| 8840631 | Retinal hemorrhage                              |
| 3628018 | Preretinal hemorrhage                           |

|                |                                                   |
|----------------|---------------------------------------------------|
| <b>7827008</b> | Subcutaneous bleeding                             |
| <b>8840635</b> | Deep retinal hemorrhage                           |
| <b>2872016</b> | Geriatric bleeding                                |
| <b>7827002</b> | Lumbar subcutaneous bleeding                      |
| <b>3628013</b> | Subretinal hemorrhage                             |
| <b>4489012</b> | Capillary hemorrhage                              |
| <b>6201004</b> | Ovarian bleeding                                  |
| <b>5967004</b> | Bladder bleeding                                  |
| <b>3628022</b> | Reticular choroidal hemorrhage                    |
| <b>8845850</b> | Gastric varices hemorrhage                        |
| <b>8838831</b> | Pulmonary hemorrhage                              |
| <b>8847483</b> | Hemorrhagic retinal pigment epithelial detachment |
